# Supplementary material for: Annulated boron substituted N-heterocyclic carbenes: theoretical prediction of highly electrophilic carbenes
Source: Royal Society of Chemistry journal article supplement (doi:10.1039/c5dt03501e), 2015-01-01
Supplement: c5dt03501e1.pdf [file c5dt03501e1.pdf]

## Electronic Supplementary Information of

### **Annulated Boron Substituted *N*-Heterocyclic Carbenes: Theoretical Prediction of Highly Electrophilic Carbenes**

Priyam Bharadwaz, Bitupon Borthakur and Ashwini K. Phukan\*

Department of Chemical Sciences, Tezpur University, Napaam 784028, Assam, India

E-mail: [ashwini@tezu.ernet.in](mailto:ashwini@tezu.ernet.in)

## Table of Contents

|                                                                                                                                                                                                              |         |
|--------------------------------------------------------------------------------------------------------------------------------------------------------------------------------------------------------------|---------|
| <b>Table S1:</b> Calculated values of important geometrical parameters for <b>1 – 33</b>                                                                                                                     | S2-S3   |
| <b>Table S2:</b> Calculated out of plane $p_{\pi}$ occupancies of the B atoms for the five membered NHCs                                                                                                     | S4      |
| <b>Table S3:</b> Calculated NICS values (in ppm) for <b>1 – 33</b>                                                                                                                                           | S5      |
| <b>Table S4:</b> Calculated $C_c$ -P and P- $C_{ph}$ Bond Lengths (in Å) of the Adducts L-PPh (L=1 – 33)                                                                                                     | S6      |
| <b>Fig. S1:</b> Optimized singlet state geometries of all the molecules                                                                                                                                      | S7-S10  |
| <b>Fig. S2:</b> Correlation plot between $q(C_c)$ and $E_{\pi^*}$ for (a) five- and (b) six-membered <i>B</i> -NHCs                                                                                          | S11     |
| <b>Fig. S3:</b> Correlation plot between $E_{\sigma}$ and PA values for <b>1 – 33</b>                                                                                                                        | S12     |
| <b>Fig. S4:</b> Correlation plot between (a) $N$ and $E_{\sigma}$ , (b) $\omega$ and $E_{\pi^*}$ of five-membered and (c) $N$ and $E_{\sigma}$ , (d) $\omega$ and $E_{\pi^*}$ of six-membered <i>B</i> -NHCs | S13-S14 |
| <b>Fig. S5:</b> Correlation plot between $C_c$ -P bond length and $E_{\pi^*}$ values for <b>1 – 33</b>                                                                                                       | S15     |
| Cartesian coordinates of the optimized geometries (singlet states only)                                                                                                                                      | S16-S45 |

**Table S1: PBE0/6-31+G\* Calculated C<sub>c</sub>-N Bond Lengths (r<sub>1</sub>/r<sub>2</sub> in Å), B-B Bond Lengths (r(B-B) in Å) and N-C<sub>c</sub>-N Bond Angles (∠N-C<sub>c</sub>-N in Degrees) of carbenes 1 – 33.**

| Molecule  | r <sub>1</sub> /r <sub>2</sub>     | r(B-B)                 | ∠N-C <sub>c</sub> -N   | Ref   |
|-----------|------------------------------------|------------------------|------------------------|-------|
| <b>1</b>  | 1.380/1.380 ( <i>1.352/1.404</i> ) | 1.737 ( <i>1.731</i> ) | 108.7 ( <i>108.4</i> ) | [11c] |
| <b>2</b>  | 1.389/1.389                        | 1.682                  | 109.8                  |       |
| <b>3</b>  | 1.395/1.377                        | 1.685                  | 110.7                  |       |
| <b>4</b>  | 1.371/1.371                        | 1.756                  | 109.5                  |       |
| <b>5</b>  | 1.391/1.391                        | 1.663                  | 109.9                  |       |
| <b>6</b>  | 1.380/1.380                        | 1.636                  | 110.7                  |       |
| <b>7</b>  | 1.353/1.413                        | 1.712                  | 106.8                  |       |
| <b>8</b>  | 1.348/1.425                        | 1.712                  | 106.3                  |       |
| <b>9</b>  | 1.385/1.385                        | 1.705                  | 105.9                  |       |
| <b>10</b> | 1.390/1.390                        | 1.706                  | 105.3                  |       |
| <b>11</b> | 1.379/1.379                        | 1.700                  | 105.4                  |       |
| <b>12</b> | 1.385/1.376                        | 1.701                  | 105.6                  |       |
| <b>13</b> | 1.407/1.407                        | 1.596                  | 107.0                  |       |
| <b>14</b> | 1.409/1.409                        | 1.604                  | 107.7                  |       |
| <b>15</b> | 1.407/1.407                        | 1.589                  | 107.3                  |       |
| <b>16</b> | 1.363/1.363 ( <i>1.366/1.363</i> ) | -                      | 114.3 ( <i>114.4</i> ) | [11a] |
| <b>17</b> | 1.389/1.346                        | -                      | 113.3                  |       |

---

|           |             |   |       |
|-----------|-------------|---|-------|
| <b>18</b> | 1.391/1.343 | - | 112.5 |
| <b>19</b> | 1.389/1.347 | - | 111.9 |
| <b>20</b> | 1.392/1.344 | - | 111.9 |
| <b>21</b> | 1.332/1.375 | - | 113.9 |
| <b>22</b> | 1.350/1.378 | - | 114.3 |
| <b>23</b> | 1.349/1.381 | - | 114.2 |
| <b>24</b> | 1.355/1.377 | - | 114.3 |
| <b>25</b> | 1.357/1.376 | - | 114.3 |
| <b>26</b> | 1.366/1.358 | - | 115.5 |
| <b>27</b> | 1.370/1.371 | - | 112.8 |
| <b>28</b> | 1.371/1.369 | - | 111.6 |
| <b>29</b> | 1.372/1.371 | - | 110.5 |
| <b>30</b> | 1.372/1.371 | - | 110.3 |
| <b>31</b> | 1.342/1.342 | - | 114.5 |
| <b>32</b> | 1.368/1.368 | - | 112.5 |
| <b>33</b> | 1.372/1.366 | - | 112.7 |

---

**Table S2: PBE0/6-31+G\* calculated out of plane  $p_\pi$  occupancies of the B atoms [Occ( $p_\pi$ )] for the five-membered NHCs (1 – 15).**

| <b>Molecule</b> | <b>Occ(<math>p_\pi</math>)</b> |
|-----------------|--------------------------------|
| <b>1</b>        | 0.220/0.220                    |
| <b>2</b>        | 0.266/0.266                    |
| <b>3</b>        | 0.311/0.314                    |
| <b>4</b>        | 0.497/0.497                    |
| <b>5</b>        | 0.313/0.313                    |
| <b>6</b>        | 0.423/0.423                    |
| <b>7</b>        | 0.195/0.413                    |
| <b>8</b>        | 0.190/0.407                    |
| <b>9</b>        | 0.366/0.366                    |
| <b>10</b>       | 0.346/0.346                    |
| <b>11</b>       | 0.417/0.417                    |
| <b>12</b>       | 0.382/0.413                    |
| <b>13</b>       | 0.414/0.414                    |
| <b>14</b>       | 0.403/0.403                    |
| <b>15</b>       | 0.456/0.456                    |

**Table S3: PBE0/6-31+G\* calculated NICS values (in ppm) of all the molecules (1 – 33).<sup>[a]</sup>**

| <b>Molecule</b> | <b>NICS (0)</b> | <b>NICS (1)</b> | <b>Molecule</b> | <b>NICS (0)</b> | <b>NICS (1)</b> |
|-----------------|-----------------|-----------------|-----------------|-----------------|-----------------|
| <b>1</b>        | 7.85            | -0.05           | <b>19</b>       | -2.89           | -5.19           |
| <b>2</b>        | 12.68           | 4.02            | <b>20</b>       | -2.74           | -5.23           |
| <b>3</b>        | 7.65            | 3.22            | <b>21</b>       | -1.49           | -2.96           |
| <b>6</b>        | -1.21           | -4.75           | <b>22</b>       | -2.33           | -4.78           |
| <b>7</b>        | 10.23           | 1.91            | <b>23</b>       | -2.20           | -4.71           |
| <b>8</b>        | 10.24           | 1.85            | <b>24</b>       | -2.47           | -4.93           |
| <b>9</b>        | 12.26           | 3.96            | <b>25</b>       | -2.73           | -5.13           |
| <b>10</b>       | 13.63           | 5.10            | <b>26</b>       | -2.66           | -3.80           |
| <b>11</b>       | 8.46            | 1.13            | <b>27</b>       | -3.27           | -5.58           |
| <b>12</b>       | 9.67            | 1.99            | <b>28</b>       | -3.64           | -5.63           |
| <b>13</b>       | 8.02            | 6.49            | <b>29</b>       | -4.39           | -6.13           |
| <b>14</b>       | 4.33            | -11.55          | <b>30</b>       | -4.08           | -6.30           |
| <b>15</b>       | 8.09            | 7.40            | <b>31</b>       | -2.04           | -2.88           |
| <b>16</b>       | -2.24           | -4.59           | <b>32</b>       | -1.92           | -4.37           |
| <b>17</b>       | -2.19           | -4.62           | <b>33</b>       | -2.52           | -4.88           |
| <b>18</b>       | -2.51           | -4.86           |                 |                 |                 |

<sup>[a]</sup>Molecules with very small singlet-triplet gaps (**4** and **5**) are not considered.

**Table S4: PBE0/6-31+G\* Calculated C<sub>c</sub>-P and P-C<sub>ph</sub> Bond Lengths (in Å) of the Adducts L-PPh (L=1 – 33).<sup>[a]</sup>**

| Molecule  | C <sub>c</sub> -P | P-C <sub>ph</sub> | Molecule  | C <sub>c</sub> -P | P-C <sub>ph</sub> |
|-----------|-------------------|-------------------|-----------|-------------------|-------------------|
| <b>1</b>  | 1.729             | 1.839             | <b>19</b> | 1.736             | 1.840             |
| <b>2</b>  | 1.729             | 1.836             | <b>20</b> | 1.736             | 1.835             |
| <b>3</b>  | 1.727             | 1.836             | <b>21</b> | 1.757             | 1.844             |
| <b>6</b>  | 1.747             | 1.836             | <b>22</b> | 1.756             | 1.836             |
| <b>7</b>  | 1.724             | 1.834             | <b>23</b> | 1.754             | 1.837             |
| <b>8</b>  | 1.720             | 1.833             | <b>24</b> | 1.752             | 1.836             |
| <b>9</b>  | 1.716             | 1.833             | <b>25</b> | 1.748             | 1.836             |
| <b>10</b> | 1.710             | 1.830             | <b>26</b> | 1.764             | 1.835             |
| <b>11</b> | 1.726             | 1.836             | <b>27</b> | 1.725             | 1.833             |
| <b>12</b> | 1.721             | 1.835             | <b>28</b> | 1.725             | 1.833             |
| <b>13</b> | 1.703             | 1.831             | <b>29</b> | 1.716             | 1.836             |
| <b>14</b> | 1.699             | 1.827             | <b>30</b> | 1.712             | 1.829             |
| <b>15</b> | 1.699             | 1.830             | <b>31</b> | 1.748             | 1.845             |
| <b>16</b> | 1.757             | 1.837             | <b>32</b> | 1.732             | 1.835             |
| <b>17</b> | 1.744             | 1.836             | <b>33</b> | 1.728             | 1.835             |
| <b>18</b> | 1.739             | 1.834             |           |                   |                   |

<sup>[a]</sup>Molecules with very small singlet-triplet gaps (**4** and **5**) are not considered.

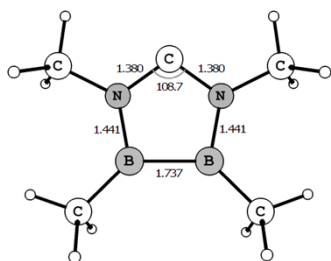

1

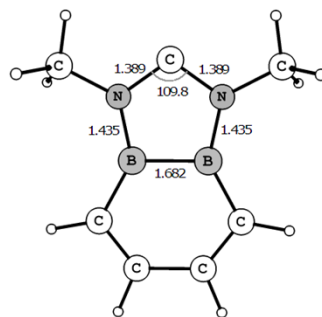

2

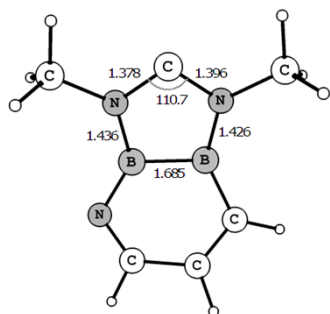

3

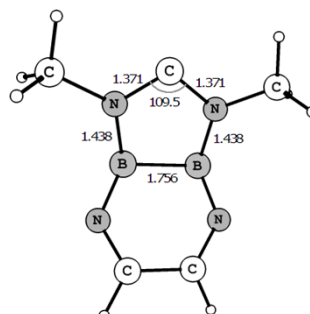

4

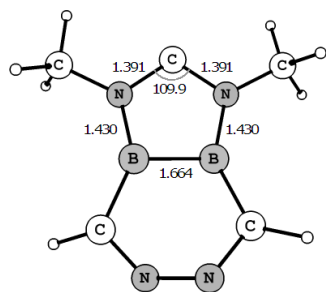

5

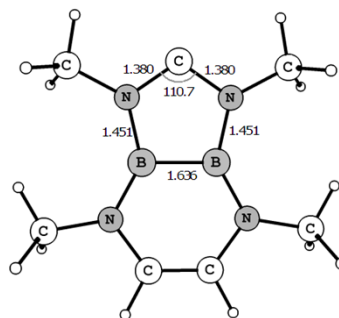

6

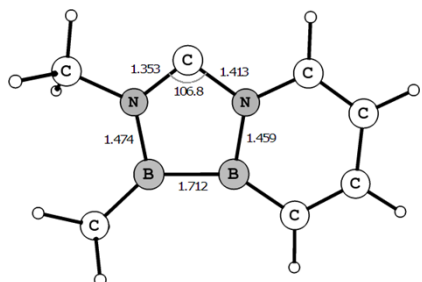

7

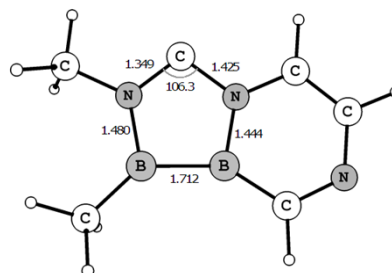

8



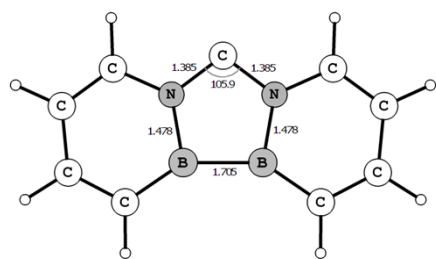

9

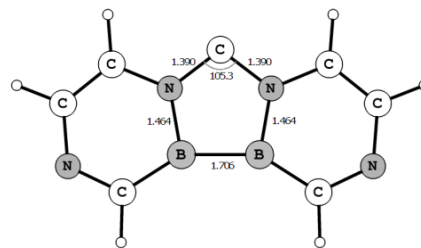

10

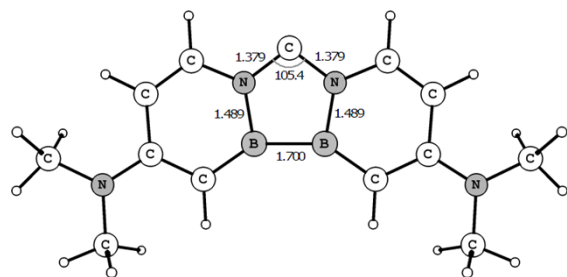

11

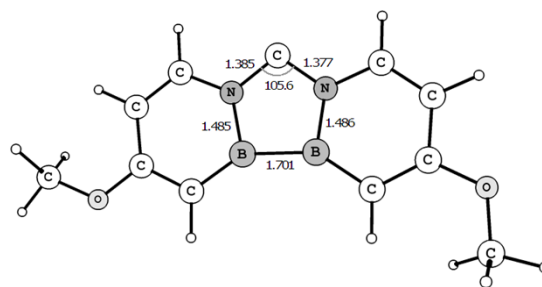

12

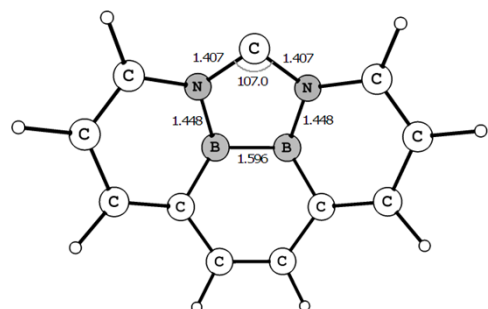

13

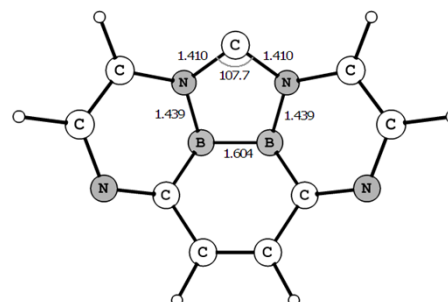

14

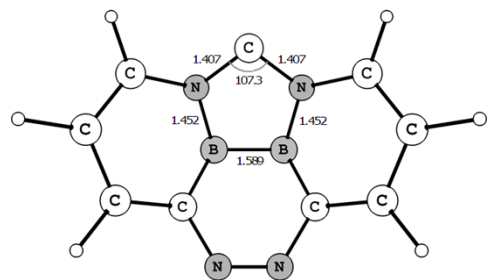

15

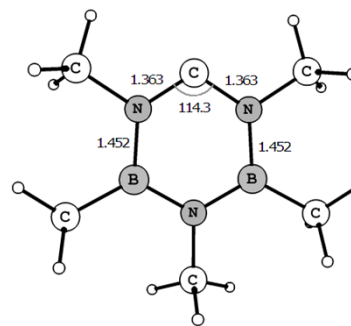

16

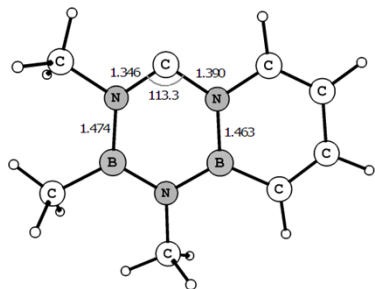

17

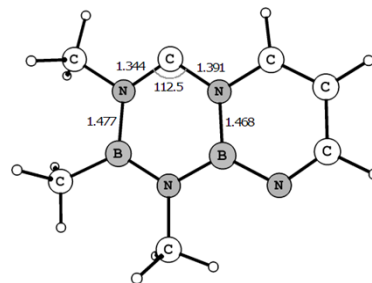

18

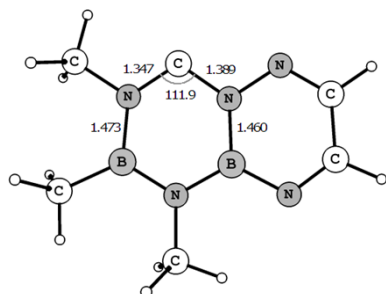

19

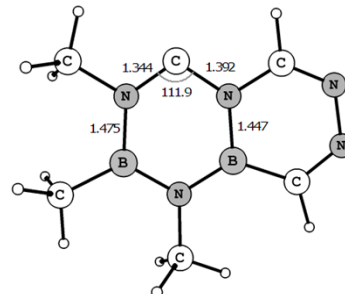

20

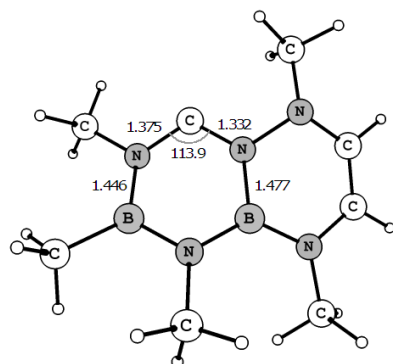

21

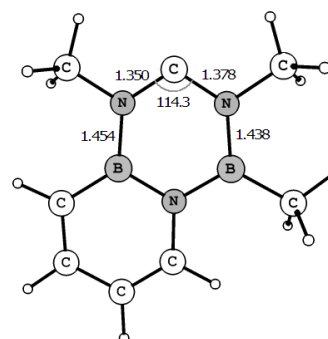

22

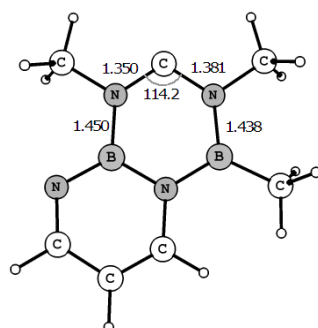

23

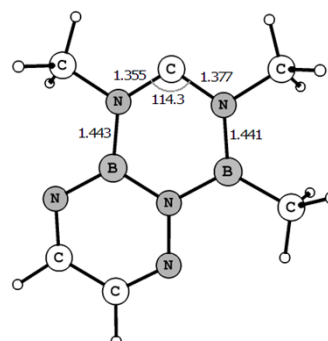

24

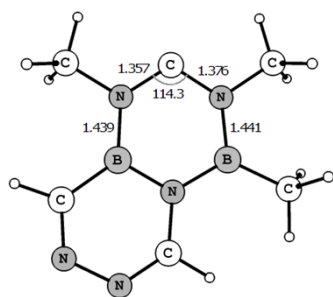

25

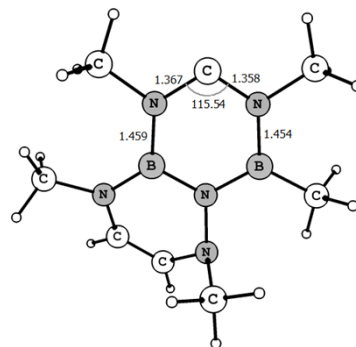

26

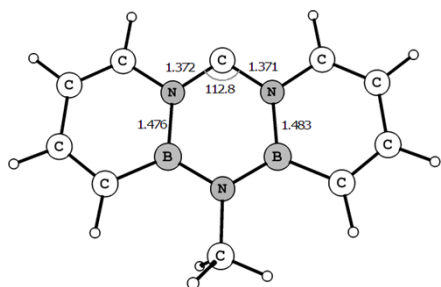

27

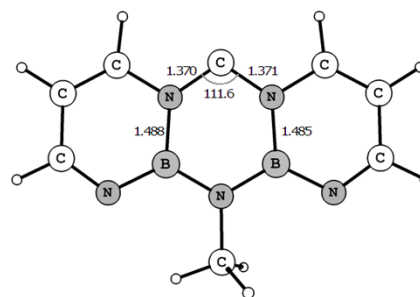

28

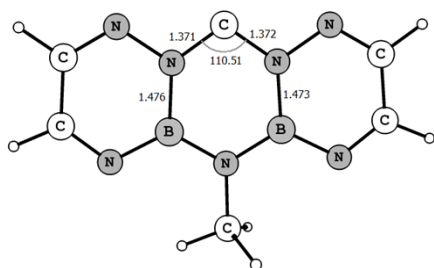

29

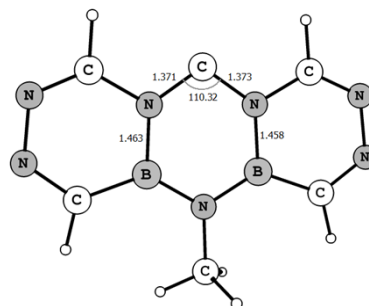

30

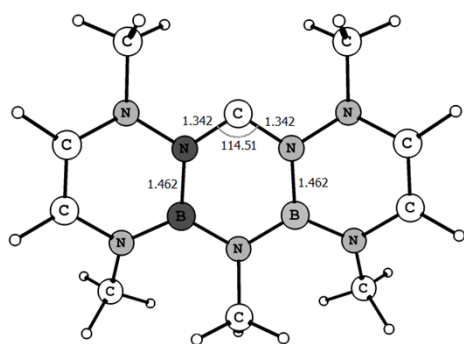

31

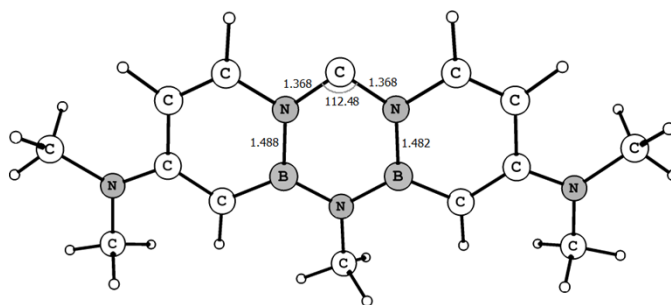

32

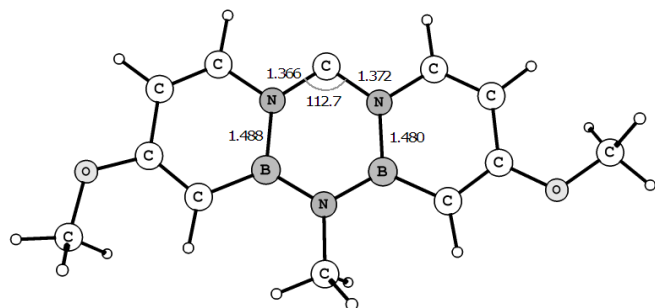

**33**

**Fig. S1:** Optimized singlet state geometries of all the molecules (1 – 33).

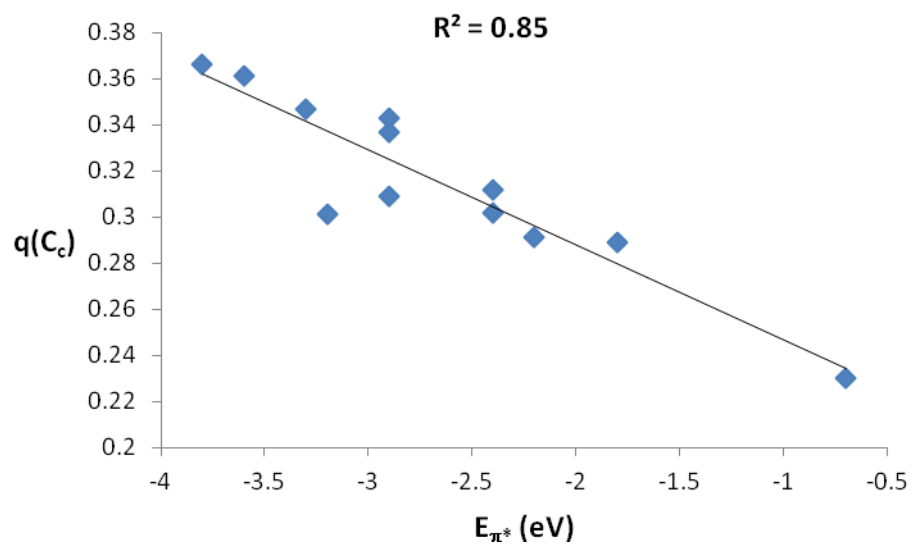

(a)

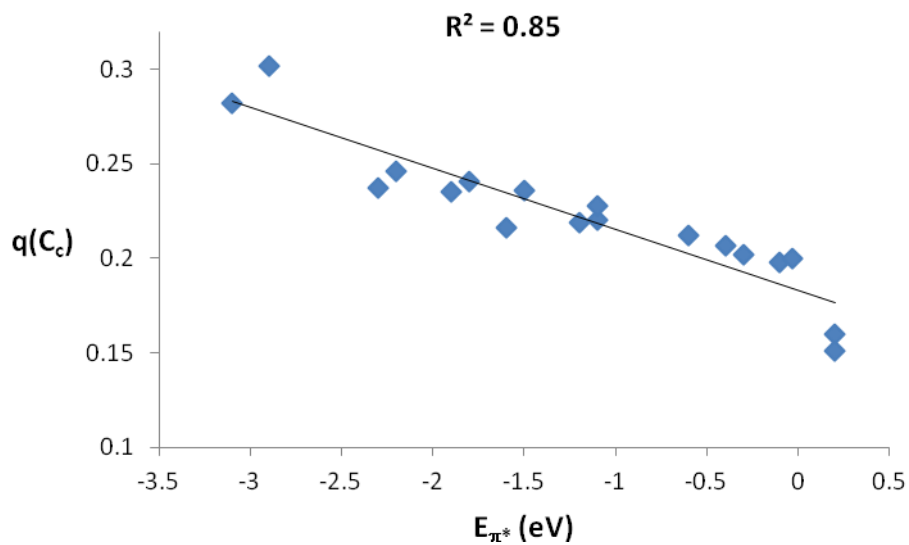

(b)

**Fig. S2:** Correlation plot between  $q(C_c)$  and  $E_{\pi^*}$  for (a) five- (omitting the point corresponding to **3**) and (b) six-membered *B*-NHCs.

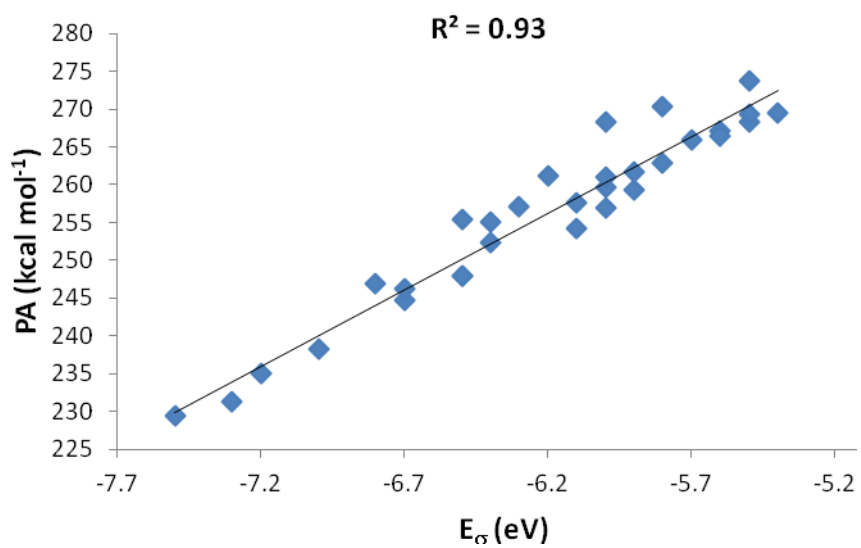

**Fig. S3:** Correlation plot between  $E_{\sigma}$  and PA values for **1** – **33**.

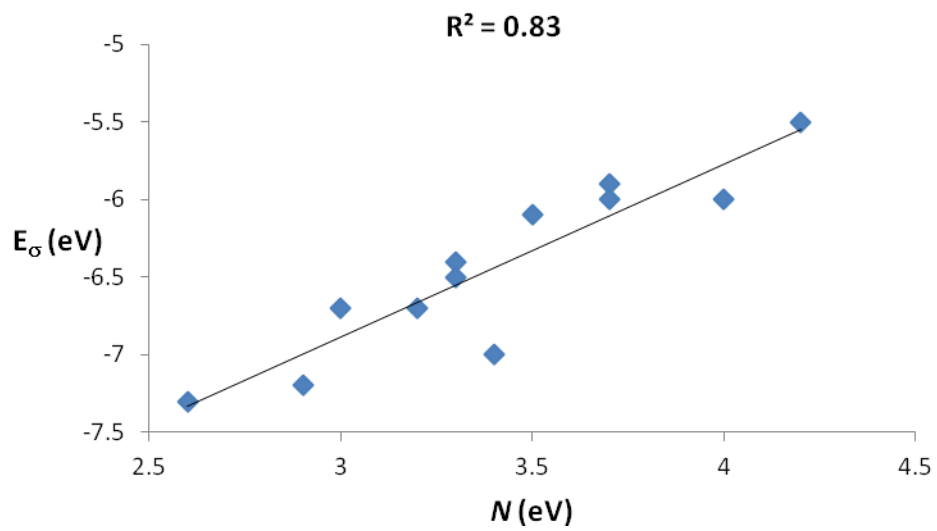

(a)

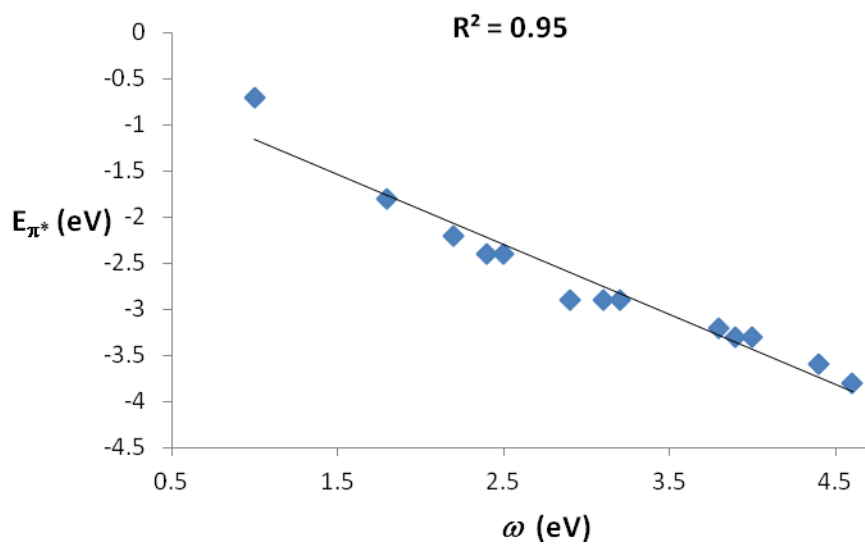

(b)

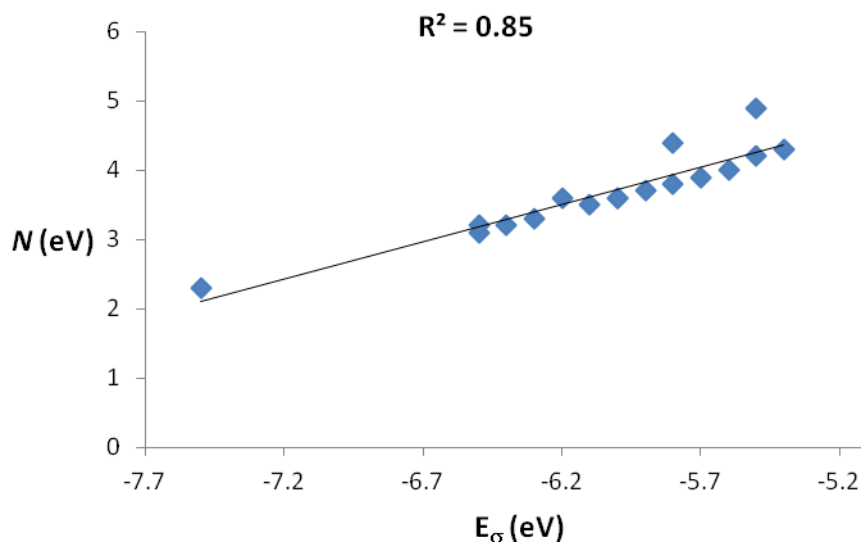

(c)

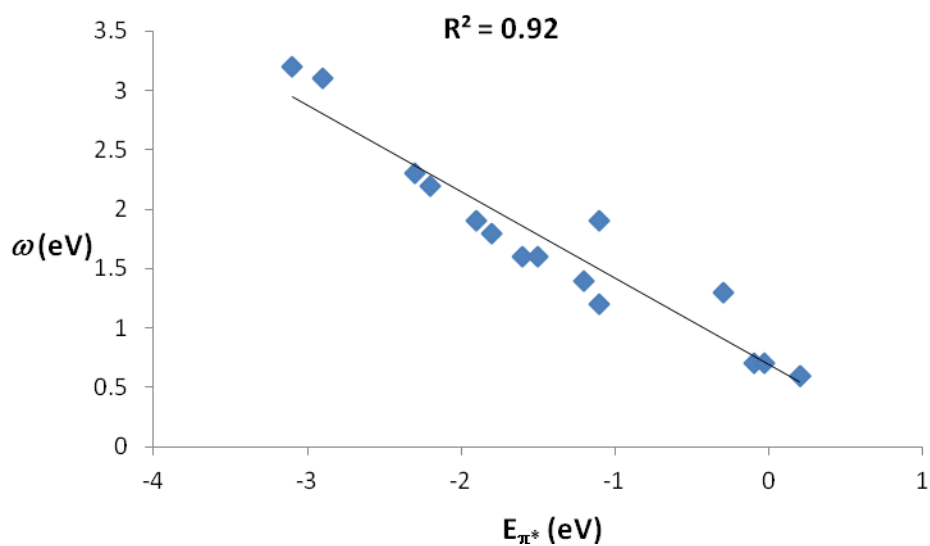

(d)

**Fig. S4:** Correlation plot between (a)  $N$  and  $E_{\sigma}$  (omitting the point corresponding to **13**), (b)  $\omega$  and  $E_{\pi^*}$  of five-membered and (c)  $N$  and  $E_{\sigma}$  (omitting the points corresponding to **31**), (d)  $\omega$  and  $E_{\pi^*}$  (omitting the points corresponding to **23** and **24**) of six-membered B-NHCs.

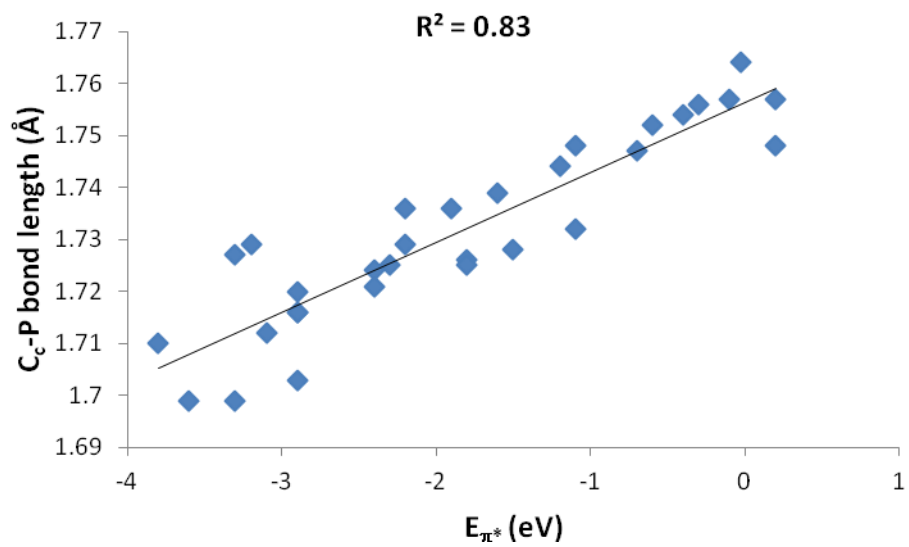

**Fig. S5:** Correlation plot between C<sub>c</sub>-P bond length and E<sub>π\*</sub> values for **1 – 33**.



Cartesian coordinates of **1** – **33** along with their total energies (in hartrees) including zero point vibrational correction.

**1**, T.E. = -356.361027

|   |              |              |              |
|---|--------------|--------------|--------------|
| 7 | 1.121381000  | -0.662810000 | 0.001319000  |
| 5 | 0.868511000  | 0.755973000  | 0.001066000  |
| 5 | -0.868535000 | 0.755943000  | -0.001531000 |
| 7 | -1.121367000 | -0.662846000 | -0.001410000 |
| 6 | 0.000005000  | -1.467725000 | 0.000062000  |
| 6 | 2.420343000  | -1.317238000 | 0.002321000  |
| 1 | 2.997463000  | -1.040563000 | 0.891688000  |
| 1 | 2.264199000  | -2.398143000 | 0.001861000  |
| 1 | 2.999058000  | -1.039987000 | -0.885816000 |
| 6 | -2.420359000 | -1.317201000 | -0.002255000 |
| 1 | -2.999425000 | -1.038884000 | 0.885309000  |
| 1 | -2.997079000 | -1.041517000 | -0.892198000 |
| 1 | -2.264317000 | -2.398123000 | -0.000524000 |
| 6 | -1.982182000 | 1.855043000  | 0.002170000  |
| 1 | -1.880281000 | 2.484311000  | 0.899258000  |
| 1 | -1.838788000 | 2.546680000  | -0.840756000 |
| 1 | -3.012900000 | 1.483835000  | -0.033073000 |
| 6 | 1.982212000  | 1.855035000  | -0.002248000 |
| 1 | 3.013019000  | 1.483628000  | 0.027800000  |
| 1 | 1.877112000  | 2.488912000  | -0.895642000 |
| 1 | 1.841852000  | 2.542378000  | 0.844759000  |

**2**, T.E. = -431.240016

|   |             |              |               |
|---|-------------|--------------|---------------|
| 5 | 0.209671000 | -0.841129000 | 0.000099000   |
| 5 | 0.209688000 | 0.841099000  | 0.000091000   |
| 6 | 1.559359000 | 1.585286000  | 0.000027000   |
| 6 | 2.629008000 | 0.746300000  | -0.000052000  |
| 6 | 2.629017000 | -0.746320000 | - 0.000041000 |

|   |              |              |              |
|---|--------------|--------------|--------------|
| 6 | 1.559372000  | -1.585304000 | 0.000031000  |
| 7 | -1.194510000 | -1.136439000 | 0.000050000  |
| 6 | -1.992716000 | 0.000035000  | -0.000055000 |
| 7 | -1.194524000 | 1.136424000  | 0.000032000  |
| 1 | 1.753691000  | 2.658405000  | 0.000019000  |
| 1 | 3.634701000  | 1.172281000  | -0.000128000 |
| 1 | 3.634714000  | -1.172291000 | -0.000098000 |
| 1 | 1.753705000  | -2.658423000 | 0.000030000  |
| 6 | -1.855752000 | -2.431205000 | -0.000044000 |
| 1 | -1.578169000 | -3.008123000 | -0.889276000 |
| 1 | -1.578149000 | -3.008246000 | 0.889099000  |
| 1 | -2.936824000 | -2.274205000 | -0.000028000 |
| 6 | -1.855684000 | 2.431238000  | -0.000033000 |
| 1 | -2.936766000 | 2.274309000  | -0.000335000 |
| 1 | -1.578292000 | 3.008113000  | 0.889285000  |
| 1 | -1.577799000 | 3.008272000  | -0.889091000 |

3, T.E. = -447.295024

|   |              |              |              |
|---|--------------|--------------|--------------|
| 5 | -0.263709000 | 0.799907000  | -0.351107000 |
| 5 | -0.179496000 | -0.882849000 | -0.364021000 |
| 6 | -1.510609000 | -1.610104000 | -0.085471000 |
| 6 | -2.510045000 | -0.756648000 | 0.264560000  |
| 6 | -2.482050000 | 0.734707000  | 0.129977000  |
| 7 | -1.506051000 | 1.511151000  | -0.187590000 |
| 7 | 1.096632000  | 1.173317000  | -0.080354000 |
| 6 | 1.900072000  | 0.077121000  | 0.144347000  |
| 7 | 1.209175000  | -1.105029000 | -0.125126000 |
| 1 | -1.726838000 | -2.679504000 | -0.093658000 |
| 1 | -3.484419000 | -1.146092000 | 0.565028000  |
| 1 | -3.475178000 | 1.189847000  | 0.239953000  |
| 6 | 1.641836000  | 2.498712000  | 0.164955000  |

|   |             |              |              |
|---|-------------|--------------|--------------|
| 1 | 1.532324000 | 3.124470000  | -0.726490000 |
| 1 | 1.118996000 | 2.985088000  | 0.995044000  |
| 1 | 2.701140000 | 2.399271000  | 0.412010000  |
| 6 | 1.906735000 | -2.357595000 | 0.115591000  |
| 1 | 2.969518000 | -2.144704000 | 0.252772000  |
| 1 | 1.526276000 | -2.854367000 | 1.015807000  |
| 1 | 1.780281000 | -3.032529000 | -0.737096000 |

4, T.E. = -463.356188

|   |              |              |              |
|---|--------------|--------------|--------------|
| 5 | -0.224371000 | 0.877859000  | -0.472550000 |
| 5 | -0.224303000 | -0.877893000 | -0.472542000 |
| 6 | -2.473771000 | -0.733025000 | 0.273476000  |
| 6 | -2.473860000 | 0.732867000  | 0.273402000  |
| 7 | 1.144530000  | 1.119893000  | -0.103598000 |
| 6 | 1.904221000  | 0.000071000  | 0.115607000  |
| 7 | 1.144631000  | -1.119812000 | -0.103639000 |
| 1 | -3.457287000 | -1.206532000 | 0.325080000  |
| 1 | -3.457454000 | 1.206246000  | 0.324657000  |
| 6 | 1.715307000  | 2.427967000  | 0.184207000  |
| 1 | 1.596387000  | 3.098407000  | -0.672725000 |
| 1 | 1.229218000  | 2.879877000  | 1.055682000  |
| 1 | 2.778446000  | 2.289183000  | 0.393001000  |
| 6 | 1.715524000  | -2.427840000 | 0.184146000  |
| 1 | 2.778659000  | -2.288971000 | 0.392901000  |
| 1 | 1.229503000  | -2.879786000 | 1.055640000  |
| 1 | 1.596624000  | -3.098290000 | -0.672780000 |
| 7 | -1.457033000 | -1.399212000 | -0.157835000 |
| 7 | -1.457164000 | 1.399101000  | -0.157930000 |

5, T.E. = -463.266625

|   |              |             |             |
|---|--------------|-------------|-------------|
| 5 | -0.237077000 | 0.827923000 | 0.079976000 |
|---|--------------|-------------|-------------|

|   |              |              |              |
|---|--------------|--------------|--------------|
| 5 | -0.237082000 | -0.827921000 | -0.080134000 |
| 6 | -1.629846000 | -1.491690000 | 0.064452000  |
| 6 | -1.629861000 | 1.491675000  | -0.064518000 |
| 7 | 1.158297000  | 1.137806000  | 0.045695000  |
| 6 | 1.957444000  | 0.000000000  | 0.000038000  |
| 7 | 1.158295000  | -1.137797000 | -0.045750000 |
| 1 | -1.882066000 | -2.494366000 | 0.415265000  |
| 1 | -1.882150000 | 2.494426000  | -0.415079000 |
| 6 | 1.823550000  | 2.431058000  | 0.086039000  |
| 1 | 1.699248000  | 2.961999000  | -0.864574000 |
| 1 | 1.408215000  | 3.048181000  | 0.888954000  |
| 1 | 2.889511000  | 2.273570000  | 0.264156000  |
| 6 | 1.823550000  | -2.431052000 | -0.085987000 |
| 1 | 2.889526000  | -2.273573000 | -0.264020000 |
| 1 | 1.699168000  | -2.961959000 | 0.864634000  |
| 1 | 1.408279000  | -3.048201000 | -0.888915000 |
| 7 | -2.581702000 | -0.618930000 | 0.250836000  |
| 7 | -2.581740000 | 0.618916000  | -0.250748000 |

6, T.E. = -543.074050

|   |              |              |              |
|---|--------------|--------------|--------------|
| 5 | 0.817977000  | 0.080982000  | -0.001022000 |
| 5 | -0.817956000 | 0.080967000  | -0.000960000 |
| 7 | -1.501844000 | -1.155958000 | -0.000206000 |
| 6 | -0.678591000 | -2.286915000 | -0.000089000 |
| 6 | 0.678580000  | -2.286913000 | -0.000025000 |
| 7 | 1.501851000  | -1.155971000 | -0.000118000 |
| 7 | 1.135476000  | 1.496495000  | -0.000350000 |
| 6 | -0.000006000 | 2.280812000  | 0.000304000  |
| 7 | -1.135456000 | 1.496499000  | -0.000168000 |
| 1 | -1.191343000 | -3.244789000 | -0.000083000 |
| 1 | 1.191324000  | -3.244792000 | 0.000026000  |

|   |              |              |              |
|---|--------------|--------------|--------------|
| 6 | 2.418817000  | 2.172114000  | 0.000120000  |
| 1 | 3.003121000  | 1.912548000  | 0.891882000  |
| 1 | 3.004341000  | 1.911238000  | -0.890447000 |
| 1 | 2.240524000  | 3.250368000  | -0.000748000 |
| 6 | -2.418822000 | 2.172074000  | 0.000358000  |
| 1 | -2.240566000 | 3.250335000  | 0.001853000  |
| 1 | -3.003482000 | 1.912979000  | -0.891302000 |
| 1 | -3.003967000 | 1.910675000  | 0.891029000  |
| 6 | -2.934911000 | -1.399096000 | 0.000376000  |
| 1 | -3.236802000 | -1.964024000 | -0.890256000 |
| 1 | -3.235677000 | -1.966130000 | 0.890021000  |
| 1 | -3.467285000 | -0.446482000 | 0.001794000  |
| 6 | 2.934862000  | -1.399132000 | 0.000586000  |
| 1 | 3.236681000  | -1.965354000 | -0.889274000 |
| 1 | 3.467295000  | -0.446569000 | 0.000554000  |
| 1 | 3.235971000  | -1.964861000 | 0.890975000  |

7, T.E. = -431.291086

|   |              |              |              |
|---|--------------|--------------|--------------|
| 7 | -1.657196000 | -0.613297000 | -0.009856000 |
| 5 | -1.316091000 | 0.820598000  | -0.021620000 |
| 6 | -0.621123000 | -1.483923000 | 0.004558000  |
| 7 | 0.562584000  | -0.711541000 | 0.000616000  |
| 6 | 1.768309000  | -1.341061000 | 0.010857000  |
| 6 | 2.919592000  | -0.600423000 | 0.008851000  |
| 6 | 2.863192000  | 0.820937000  | -0.003348000 |
| 6 | 1.674508000  | 1.527133000  | -0.013867000 |
| 5 | 0.394063000  | 0.737784000  | -0.012395000 |
| 1 | 1.743918000  | -2.427210000 | 0.020257000  |
| 1 | 3.878230000  | -1.109055000 | 0.016805000  |
| 1 | 3.815610000  | 1.352847000  | -0.004233000 |
| 1 | 1.730733000  | 2.614569000  | -0.022821000 |

|   |              |              |              |
|---|--------------|--------------|--------------|
| 6 | -2.403951000 | 1.939318000  | 0.010432000  |
| 1 | -2.503506000 | 2.272198000  | 1.057609000  |
| 1 | -2.098121000 | 2.831826000  | -0.547749000 |
| 1 | -3.404250000 | 1.637158000  | -0.321739000 |
| 6 | -3.006541000 | -1.159126000 | -0.007756000 |
| 1 | -3.568902000 | -0.789511000 | 0.856133000  |
| 1 | -3.541274000 | -0.870020000 | -0.918968000 |
| 1 | -2.943922000 | -2.247978000 | 0.041099000  |

8, T.E. = -447.316886

|   |              |              |              |
|---|--------------|--------------|--------------|
| 7 | -1.650593000 | -0.619070000 | -0.008939000 |
| 5 | -1.307416000 | 0.820118000  | -0.020703000 |
| 6 | -0.622167000 | -1.491228000 | 0.004948000  |
| 7 | 0.567923000  | -0.707718000 | 0.000559000  |
| 6 | 1.784100000  | -1.309766000 | 0.009990000  |
| 6 | 2.906642000  | -0.520805000 | 0.007668000  |
| 7 | 2.882631000  | 0.838792000  | -0.003042000 |
| 6 | 1.722199000  | 1.475217000  | -0.012354000 |
| 5 | 0.401793000  | 0.726986000  | -0.011777000 |
| 1 | 1.803471000  | -2.395712000 | 0.019045000  |
| 1 | 3.890175000  | -0.981642000 | 0.014753000  |
| 1 | 1.818316000  | 2.562954000  | -0.020336000 |
| 6 | -2.387494000 | 1.942324000  | 0.008762000  |
| 1 | -2.441006000 | 2.321233000  | 1.043543000  |
| 1 | -2.094780000 | 2.809081000  | -0.595779000 |
| 1 | -3.401561000 | 1.636998000  | -0.273201000 |
| 6 | -3.003617000 | -1.158294000 | -0.006803000 |
| 1 | -3.560281000 | -0.790479000 | 0.861152000  |
| 1 | -3.537318000 | -0.859135000 | -0.914915000 |
| 1 | -2.946611000 | -2.247542000 | 0.034832000  |

**9**, T.E. = -506.215095

|   |              |              |              |
|---|--------------|--------------|--------------|
| 6 | -3.318367000 | 0.959228000  | 0.000018000  |
| 6 | -3.456408000 | -0.464750000 | 0.000016000  |
| 6 | -2.358955000 | -1.270245000 | -0.000001000 |
| 7 | -1.105721000 | -0.711010000 | -0.000018000 |
| 5 | -0.852555000 | 0.745417000  | -0.000024000 |
| 6 | -2.098514000 | 1.597066000  | -0.000002000 |
| 1 | -4.240962000 | 1.541079000  | 0.000037000  |
| 1 | -4.444329000 | -0.913779000 | 0.000029000  |
| 1 | -2.396267000 | -2.355530000 | -0.000002000 |
| 1 | -2.092462000 | 2.685564000  | 0.000000000  |
| 6 | 0.000000000  | -1.545048000 | -0.000013000 |
| 7 | 1.105721000  | -0.711010000 | -0.000010000 |
| 6 | 2.358955000  | -1.270245000 | 0.000010000  |
| 6 | 3.456408000  | -0.464750000 | 0.000017000  |
| 6 | 3.318367000  | 0.959228000  | 0.000011000  |
| 6 | 2.098514000  | 1.597066000  | -0.000007000 |
| 5 | 0.852555000  | 0.745417000  | -0.000019000 |
| 1 | 2.396267000  | -2.355529000 | 0.000013000  |
| 1 | 4.444329000  | -0.913779000 | 0.000029000  |
| 1 | 4.240962000  | 1.541079000  | 0.000020000  |
| 1 | 2.092462000  | 2.685564000  | -0.000012000 |

**10**, T.E. = -538.263224

|   |             |              |              |
|---|-------------|--------------|--------------|
| 7 | 3.327039000 | -0.981961000 | 0.000001000  |
| 6 | 3.433028000 | 0.383315000  | 0.000001000  |
| 6 | 2.370997000 | 1.237753000  | 0.000000000  |
| 7 | 1.104826000 | 0.711345000  | -0.000001000 |
| 5 | 0.853208000 | -0.730833000 | -0.000001000 |
| 6 | 2.139648000 | -1.550092000 | 0.000000000  |
| 1 | 4.444122000 | 0.778792000  | 0.000002000  |

|   |              |              |              |
|---|--------------|--------------|--------------|
| 1 | 2.456327000  | 2.319827000  | -0.000001000 |
| 1 | 2.168788000  | -2.641228000 | 0.000000000  |
| 6 | 0.000000000  | 1.555077000  | 0.000000000  |
| 7 | -1.104826000 | 0.711345000  | -0.000001000 |
| 6 | -2.370997000 | 1.237753000  | 0.000000000  |
| 6 | -3.433028000 | 0.383315000  | 0.000001000  |
| 7 | -3.327039000 | -0.981961000 | 0.000001000  |
| 6 | -2.139648000 | -1.550092000 | 0.000000000  |
| 5 | -0.853208000 | -0.730833000 | -0.000001000 |
| 1 | -2.456327000 | 2.319827000  | 0.000001000  |
| 1 | -4.444122000 | 0.778792000  | 0.000002000  |
| 1 | -2.168788000 | -2.641228000 | -0.000001000 |

**11, T.E. = -773.715579**

|   |              |              |              |
|---|--------------|--------------|--------------|
| 6 | 3.338736000  | 0.250853000  | -0.000021000 |
| 6 | 3.451901000  | -1.194818000 | -0.000016000 |
| 6 | 2.357869000  | -1.998246000 | -0.000005000 |
| 7 | 1.096578000  | -1.471858000 | 0.000003000  |
| 5 | 0.849993000  | -0.003811000 | 0.000064000  |
| 6 | 2.071590000  | 0.849229000  | 0.000085000  |
| 1 | 4.423963000  | -1.671531000 | 0.000003000  |
| 1 | 2.424130000  | -3.083002000 | 0.000006000  |
| 1 | 2.011687000  | 1.933680000  | 0.000161000  |
| 6 | 0.000007000  | -2.307400000 | -0.000024000 |
| 7 | -1.096573000 | -1.471866000 | -0.000009000 |
| 6 | -2.357863000 | -1.998246000 | -0.000014000 |
| 6 | -3.451896000 | -1.194818000 | -0.000021000 |
| 6 | -3.338738000 | 0.250853000  | -0.000037000 |
| 6 | -2.071583000 | 0.849221000  | 0.000090000  |
| 5 | -0.849999000 | -0.003829000 | 0.000065000  |
| 1 | -2.424135000 | -3.083001000 | 0.000011000  |



|   |              |              |              |
|---|--------------|--------------|--------------|
| 1 | -4.423949000 | -1.671545000 | 0.000036000  |
| 1 | -2.011668000 | 1.933671000  | 0.000188000  |
| 7 | 4.492318000  | 0.984888000  | -0.000122000 |
| 7 | -4.492315000 | 0.984884000  | -0.000145000 |
| 6 | 4.413460000  | 2.428991000  | -0.000031000 |
| 1 | 3.886737000  | 2.801324000  | -0.888822000 |
| 1 | 3.887182000  | 2.801276000  | 0.889050000  |
| 1 | 5.421663000  | 2.846163000  | -0.000278000 |
| 6 | 5.795553000  | 0.353272000  | 0.000036000  |
| 1 | 5.948599000  | -0.269696000 | 0.891190000  |
| 1 | 5.948579000  | -0.270106000 | -0.890825000 |
| 1 | 6.565399000  | 1.126395000  | -0.000152000 |
| 6 | -4.413476000 | 2.428985000  | -0.000009000 |
| 1 | -5.421688000 | 2.846138000  | -0.000431000 |
| 1 | -3.887354000 | 2.801262000  | 0.889170000  |
| 1 | -3.886611000 | 2.801333000  | -0.888703000 |
| 6 | -5.795557000 | 0.353274000  | 0.000040000  |
| 1 | -5.948647000 | -0.269585000 | 0.891262000  |
| 1 | -6.565398000 | 1.126401000  | -0.000296000 |
| 1 | -5.948541000 | -0.270213000 | -0.890749000 |

**12**, T.E. = -734.970817

|   |              |              |              |
|---|--------------|--------------|--------------|
| 6 | -3.419810000 | -0.227174000 | 0.000001000  |
| 6 | -3.470425000 | 1.212217000  | 0.000002000  |
| 6 | -2.334231000 | 1.949314000  | 0.000001000  |
| 7 | -1.109028000 | 1.328192000  | 0.000000000  |
| 5 | -0.953232000 | -0.149399000 | -0.000001000 |
| 6 | -2.231526000 | -0.933366000 | 0.000000000  |
| 1 | -4.442668000 | 1.692399000  | 0.000003000  |
| 1 | -2.321535000 | 3.035243000  | 0.000002000  |
| 1 | -2.257984000 | -2.019365000 | -0.000001000 |

|   |              |              |              |
|---|--------------|--------------|--------------|
| 6 | 0.038349000  | 2.088744000  | 0.000000000  |
| 7 | 1.086555000  | 1.183297000  | -0.000001000 |
| 6 | 2.370764000  | 1.644987000  | -0.000002000 |
| 6 | 3.418812000  | 0.775981000  | -0.000003000 |
| 6 | 3.188392000  | -0.642975000 | -0.000003000 |
| 6 | 1.915094000  | -1.187306000 | -0.000003000 |
| 5 | 0.744234000  | -0.261834000 | -0.000002000 |
| 1 | 2.493354000  | 2.724473000  | -0.000002000 |
| 1 | 4.423518000  | 1.179926000  | -0.000004000 |
| 1 | 1.855366000  | -2.273640000 | -0.000003000 |
| 8 | 4.223412000  | -1.509200000 | -0.000004000 |
| 8 | -4.651628000 | -0.772241000 | 0.000001000  |
| 6 | 5.554124000  | -1.030525000 | 0.000008000  |
| 1 | 5.767685000  | -0.437362000 | -0.897386000 |
| 1 | 5.767666000  | -0.437357000 | 0.897403000  |
| 1 | 6.185460000  | -1.920341000 | 0.000018000  |
| 6 | -4.763758000 | -2.182298000 | 0.000000000  |
| 1 | -4.301894000 | -2.613888000 | -0.895745000 |
| 1 | -4.301892000 | -2.613890000 | 0.895742000  |
| 1 | -5.833751000 | -2.394521000 | 0.000001000  |

**13**, T.E. = -582.263802

|   |              |              |              |
|---|--------------|--------------|--------------|
| 6 | -2.753212000 | 0.871253000  | -0.333143000 |
| 6 | -3.189068000 | -0.497319000 | -0.437010000 |
| 6 | -2.375319000 | -1.576861000 | -0.186736000 |
| 7 | -1.131129000 | -1.353723000 | 0.361542000  |
| 5 | -0.798199000 | -0.004005000 | 0.767940000  |
| 6 | -1.518693000 | 1.182504000  | 0.211965000  |
| 1 | -3.394821000 | 1.624283000  | -0.797572000 |
| 1 | -4.168348000 | -0.695479000 | -0.863231000 |
| 1 | -2.636008000 | -2.595233000 | -0.460624000 |

|   |              |              |              |
|---|--------------|--------------|--------------|
| 6 | -0.000002000 | -2.116435000 | 0.018395000  |
| 7 | 1.131130000  | -1.353723000 | 0.361545000  |
| 6 | 2.375316000  | -1.576862000 | -0.186738000 |
| 6 | 3.189068000  | -0.497320000 | -0.437012000 |
| 6 | 2.753213000  | 0.871250000  | -0.333142000 |
| 6 | 1.518694000  | 1.182501000  | 0.211968000  |
| 5 | 0.798201000  | -0.004007000 | 0.767944000  |
| 1 | 2.636002000  | -2.595233000 | -0.460631000 |
| 1 | 4.168345000  | -0.695482000 | -0.863236000 |
| 1 | 3.394821000  | 1.624282000  | -0.797571000 |
| 6 | 0.689407000  | 2.383909000  | 0.057339000  |
| 6 | -0.689404000 | 2.383911000  | 0.057337000  |
| 1 | 1.177750000  | 3.330926000  | -0.178753000 |
| 1 | -1.177745000 | 3.330929000  | -0.178755000 |

**14**, T.E. = -614.315555

|   |              |              |              |
|---|--------------|--------------|--------------|
| 7 | -2.669268000 | 0.922146000  | -0.368263000 |
| 6 | -3.127833000 | -0.369522000 | -0.448852000 |
| 6 | -2.382490000 | -1.505247000 | -0.216622000 |
| 7 | -1.138313000 | -1.362942000 | 0.368613000  |
| 5 | -0.802079000 | -0.058205000 | 0.874347000  |
| 6 | -1.510378000 | 1.115911000  | 0.239828000  |
| 1 | -4.119256000 | -0.483323000 | -0.877668000 |
| 1 | -2.692025000 | -2.491488000 | -0.547862000 |
| 6 | 0.000000000  | -2.066133000 | -0.075414000 |
| 7 | 1.138313000  | -1.362942000 | 0.368613000  |
| 6 | 2.382490000  | -1.505247000 | -0.216622000 |
| 6 | 3.127833000  | -0.369522000 | -0.448852000 |
| 7 | 2.669268000  | 0.922146000  | -0.368263000 |
| 6 | 1.510378000  | 1.115911000  | 0.239829000  |
| 5 | 0.802079000  | -0.058206000 | 0.874347000  |

|   |              |              |              |
|---|--------------|--------------|--------------|
| 1 | 2.692024000  | -2.491488000 | -0.547862000 |
| 1 | 4.119256000  | -0.483323000 | -0.877668000 |
| 6 | 0.688242000  | 2.313700000  | 0.022555000  |
| 6 | -0.688242000 | 2.313700000  | 0.022555000  |
| 1 | 1.196855000  | 3.220760000  | -0.303872000 |
| 1 | -1.196855000 | 3.220760000  | -0.303872000 |

**15**, T.E. = -614.291724

|   |              |              |              |
|---|--------------|--------------|--------------|
| 6 | -2.543419000 | 0.924708000  | -0.455147000 |
| 6 | -3.048959000 | -0.413882000 | -0.589108000 |
| 6 | -2.320908000 | -1.524327000 | -0.235491000 |
| 7 | -1.132906000 | -1.359867000 | 0.449917000  |
| 5 | -0.794729000 | -0.033873000 | 0.936416000  |
| 6 | -1.388757000 | 1.158311000  | 0.265830000  |
| 1 | -3.019362000 | 1.714788000  | -1.038470000 |
| 1 | -3.974928000 | -0.569832000 | -1.134367000 |
| 1 | -2.588137000 | -2.530347000 | -0.546079000 |
| 6 | -0.000002000 | -2.105843000 | 0.077380000  |
| 7 | 1.132904000  | -1.359869000 | 0.449915000  |
| 6 | 2.320904000  | -1.524331000 | -0.235495000 |
| 6 | 3.048957000  | -0.413886000 | -0.589110000 |
| 6 | 2.543420000  | 0.924704000  | -0.455145000 |
| 6 | 1.388760000  | 1.158309000  | 0.265834000  |
| 5 | 0.794729000  | -0.033875000 | 0.936417000  |
| 1 | 2.588130000  | -2.530350000 | -0.546086000 |
| 1 | 3.974925000  | -0.569837000 | -1.134370000 |
| 1 | 3.019365000  | 1.714786000  | -1.038466000 |
| 7 | 0.634249000  | 2.360365000  | 0.105547000  |
| 7 | -0.634243000 | 2.360365000  | 0.105536000  |

**16**, T.E. = -450.983839

|   |              |              |              |
|---|--------------|--------------|--------------|
| 7 | -0.000078000 | 1.138143000  | -0.020096000 |
| 5 | 1.238977000  | 0.423062000  | 0.009053000  |
| 7 | 1.144908000  | -1.025427000 | 0.000182000  |
| 6 | 0.000192000  | -1.764744000 | -0.013493000 |
| 7 | -1.144656000 | -1.025651000 | 0.000174000  |
| 5 | -1.238975000 | 0.422790000  | 0.009093000  |
| 6 | -0.000494000 | 2.596188000  | -0.038631000 |
| 1 | -0.881795000 | 2.977379000  | -0.560208000 |
| 1 | -0.003286000 | 3.010479000  | 0.978054000  |
| 1 | 0.883226000  | 2.977942000  | -0.555614000 |
| 6 | 2.631252000  | 1.173676000  | 0.035711000  |
| 1 | 2.854715000  | 1.616092000  | -0.946682000 |
| 1 | 2.630436000  | 2.006366000  | 0.750603000  |
| 1 | 3.477028000  | 0.528382000  | 0.288109000  |
| 6 | 2.368674000  | -1.827155000 | -0.005880000 |
| 1 | 3.004801000  | -1.568169000 | -0.859105000 |
| 1 | 2.942098000  | -1.678778000 | 0.916074000  |
| 1 | 2.075788000  | -2.875533000 | -0.078957000 |
| 6 | -2.368313000 | -1.827552000 | -0.005891000 |
| 1 | -2.075311000 | -2.875858000 | -0.079487000 |
| 1 | -2.941497000 | -1.679640000 | 0.916293000  |
| 1 | -3.004713000 | -1.568261000 | -0.858819000 |
| 6 | -2.631333000 | 1.173211000  | 0.035741000  |
| 1 | -2.855803000 | 1.613702000  | -0.947294000 |
| 1 | -3.476738000 | 0.528180000  | 0.290098000  |
| 1 | -2.630043000 | 2.007254000  | 0.749040000  |

17, T.E. = -525.909417

|   |              |              |              |
|---|--------------|--------------|--------------|
| 7 | 1.481197000  | -1.103132000 | -0.000020000 |
| 6 | 0.297322000  | -1.744381000 | -0.000007000 |
| 7 | -0.794630000 | -0.884791000 | 0.000009000  |

|   |              |              |              |
|---|--------------|--------------|--------------|
| 5 | -0.747564000 | 0.577578000  | -0.000016000 |
| 7 | 0.560449000  | 1.174801000  | -0.000025000 |
| 5 | 1.715920000  | 0.352013000  | 0.000017000  |
| 1 | -1.939427000 | -2.615206000 | 0.000042000  |
| 6 | -2.016021000 | -1.532560000 | 0.000029000  |
| 6 | -2.081596000 | 1.312802000  | -0.000024000 |
| 6 | -3.228147000 | 0.569301000  | 0.000007000  |
| 6 | -3.196110000 | -0.861511000 | 0.000035000  |
| 1 | -2.172937000 | 2.397691000  | -0.000048000 |
| 1 | -4.205566000 | 1.052356000  | 0.000010000  |
| 1 | -4.120656000 | -1.429976000 | 0.000054000  |
| 6 | 2.636385000  | -2.004621000 | -0.000062000 |
| 1 | 3.253908000  | -1.845538000 | -0.890152000 |
| 1 | 3.253816000  | -1.845741000 | 0.890130000  |
| 1 | 2.258362000  | -3.027619000 | -0.000193000 |
| 6 | 3.180442000  | 0.951021000  | 0.000099000  |
| 1 | 3.344800000  | 1.590989000  | -0.877771000 |
| 1 | 3.344615000  | 1.591121000  | 0.877907000  |
| 1 | 3.976048000  | 0.202263000  | 0.000239000  |
| 6 | 0.646850000  | 2.629379000  | -0.000046000 |
| 1 | 0.157202000  | 3.048752000  | -0.886506000 |
| 1 | 0.157224000  | 3.048782000  | 0.886412000  |
| 1 | 1.686957000  | 2.959450000  | -0.000066000 |

**18**, T.E. = -541.972085

|   |              |              |              |
|---|--------------|--------------|--------------|
| 7 | -1.463805000 | -1.093459000 | -0.000039000 |
| 6 | -0.294958000 | -1.755932000 | -0.000041000 |
| 7 | 0.801738000  | -0.900315000 | -0.000019000 |
| 5 | 0.780869000  | 0.567523000  | -0.000032000 |
| 7 | -0.514081000 | 1.182209000  | -0.000058000 |
| 5 | -1.675092000 | 0.368836000  | -0.000021000 |

|   |              |              |              |
|---|--------------|--------------|--------------|
| 1 | 1.975757000  | -2.611583000 | -0.000024000 |
| 6 | 2.025381000  | -1.526506000 | 0.000005000  |
| 7 | 2.006419000  | 1.306901000  | -0.000011000 |
| 6 | 3.109444000  | 0.620900000  | 0.000049000  |
| 6 | 3.181306000  | -0.811701000 | 0.000048000  |
| 1 | 4.056963000  | 1.171921000  | 0.000086000  |
| 1 | 4.140080000  | -1.319302000 | 0.000083000  |
| 6 | -2.643714000 | -1.960414000 | -0.000003000 |
| 1 | -3.257380000 | -1.779321000 | 0.888379000  |
| 1 | -3.257234000 | -1.779616000 | -0.888543000 |
| 1 | -2.300344000 | -2.995609000 | 0.000184000  |
| 6 | -3.145529000 | 0.939928000  | 0.000100000  |
| 1 | -3.186976000 | 2.032865000  | -0.000355000 |
| 1 | -3.711184000 | 0.592392000  | -0.875150000 |
| 1 | -3.710728000 | 0.593149000  | 0.875946000  |
| 6 | -0.603066000 | 2.641173000  | -0.000047000 |
| 1 | -1.133547000 | 3.000286000  | 0.888255000  |
| 1 | 0.404405000  | 3.060682000  | -0.000155000 |
| 1 | -1.133787000 | 3.000295000  | -0.888215000 |

**19**, T.E. = -557.978497

|   |              |              |              |
|---|--------------|--------------|--------------|
| 7 | -1.441980000 | -1.091055000 | 0.000000000  |
| 6 | -0.271900000 | -1.759258000 | 0.000009000  |
| 7 | 0.817874000  | -0.898513000 | 0.000001000  |
| 5 | 0.782438000  | 0.561351000  | -0.000005000 |
| 7 | -0.502605000 | 1.181853000  | -0.000010000 |
| 5 | -1.665031000 | 0.364706000  | -0.000010000 |
| 7 | 1.998044000  | -1.571188000 | 0.000009000  |
| 7 | 2.015951000  | 1.305626000  | -0.000007000 |
| 6 | 3.088824000  | 0.589446000  | -0.000004000 |
| 6 | 3.077728000  | -0.856004000 | 0.000007000  |

|   |              |              |              |
|---|--------------|--------------|--------------|
| 1 | 4.065064000  | 1.086836000  | -0.000007000 |
| 1 | 4.010626000  | -1.414923000 | 0.000009000  |
| 6 | -2.619301000 | -1.963617000 | -0.000014000 |
| 1 | -3.233487000 | -1.785093000 | 0.888607000  |
| 1 | -3.233266000 | -1.785363000 | -0.888845000 |
| 1 | -2.269659000 | -2.996462000 | 0.000177000  |
| 6 | -3.134588000 | 0.934664000  | 0.000012000  |
| 1 | -3.179802000 | 2.027511000  | -0.000259000 |
| 1 | -3.698827000 | 0.584790000  | -0.875099000 |
| 1 | -3.698561000 | 0.585253000  | 0.875486000  |
| 6 | -0.593943000 | 2.641082000  | -0.000001000 |
| 1 | -1.125886000 | 2.997694000  | 0.888130000  |
| 1 | 0.410757000  | 3.066826000  | -0.000006000 |
| 1 | -1.125897000 | 2.997705000  | -0.888121000 |

**20**, T.E. = -557.955291

|   |              |              |              |
|---|--------------|--------------|--------------|
| 7 | -1.449986000 | -1.098813000 | 0.000000000  |
| 6 | -0.271152000 | -1.744270000 | 0.000009000  |
| 7 | 0.805189000  | -0.860849000 | 0.000001000  |
| 5 | 0.755144000  | 0.585191000  | -0.000003000 |
| 7 | -0.532462000 | 1.196533000  | -0.000005000 |
| 5 | -1.684862000 | 0.357756000  | -0.000010000 |
| 6 | 2.050639000  | -1.455190000 | 0.000005000  |
| 6 | 2.153003000  | 1.225321000  | -0.000005000 |
| 7 | 3.249721000  | 0.523916000  | -0.000003000 |
| 7 | 3.191598000  | -0.851510000 | 0.000002000  |
| 6 | -2.617583000 | -1.984664000 | -0.000006000 |
| 1 | -3.232619000 | -1.812991000 | 0.888857000  |
| 1 | -3.232436000 | -1.813220000 | -0.889042000 |
| 1 | -2.257212000 | -3.013822000 | 0.000156000  |
| 6 | -3.161327000 | 0.906954000  | 0.000001000  |



|   |              |              |              |
|---|--------------|--------------|--------------|
| 1 | -3.227569000 | 1.998524000  | -0.000241000 |
| 1 | -3.719953000 | 0.547766000  | -0.874877000 |
| 1 | -3.719743000 | 0.548181000  | 0.875188000  |
| 6 | -0.668084000 | 2.650799000  | 0.000004000  |
| 1 | -1.208255000 | 2.994397000  | 0.887958000  |
| 1 | 0.314172000  | 3.125908000  | 0.000047000  |
| 1 | -1.208186000 | 2.994417000  | -0.887985000 |
| 1 | 2.034027000  | -2.542211000 | 0.000010000  |
| 1 | 2.344969000  | 2.299683000  | -0.000010000 |

**21**, T.E. = -637.611359

|   |              |              |              |
|---|--------------|--------------|--------------|
| 7 | 1.710019000  | -1.139286000 | -0.276054000 |
| 6 | 0.470002000  | -1.709301000 | -0.110572000 |
| 7 | -0.505701000 | -0.828837000 | 0.105188000  |
| 5 | -0.382663000 | 0.643018000  | 0.079712000  |
| 7 | 0.953560000  | 1.136637000  | 0.252925000  |
| 5 | 2.045146000  | 0.239286000  | 0.003353000  |
| 6 | -2.765712000 | 0.685003000  | -0.336504000 |
| 6 | -2.853116000 | -0.621991000 | -0.055198000 |
| 1 | -3.626349000 | 1.242848000  | -0.686989000 |
| 1 | -3.791802000 | -1.154828000 | -0.150718000 |
| 6 | 2.769729000  | -2.095223000 | -0.588130000 |
| 1 | 3.271440000  | -1.834152000 | -1.527222000 |
| 1 | 3.522346000  | -2.135758000 | 0.208078000  |
| 1 | 2.311031000  | -3.079767000 | -0.692419000 |
| 6 | 3.548693000  | 0.726820000  | 0.077434000  |
| 1 | 3.671454000  | 1.772163000  | -0.229185000 |
| 1 | 3.925355000  | 0.659354000  | 1.109675000  |
| 1 | 4.225156000  | 0.124036000  | -0.536343000 |
| 6 | 1.233107000  | 2.491229000  | 0.715533000  |
| 1 | 1.511737000  | 3.168186000  | -0.102846000 |

|   |              |              |              |
|---|--------------|--------------|--------------|
| 1 | 0.364236000  | 2.909498000  | 1.229840000  |
| 1 | 2.060140000  | 2.480262000  | 1.431804000  |
| 7 | -1.787481000 | -1.351572000 | 0.463708000  |
| 7 | -1.559654000 | 1.397149000  | -0.188053000 |
| 6 | -1.893634000 | -2.792226000 | 0.449277000  |
| 1 | -1.713987000 | -3.227508000 | -0.544776000 |
| 1 | -1.165445000 | -3.226374000 | 1.136352000  |
| 1 | -2.905347000 | -3.032599000 | 0.789365000  |
| 6 | -1.625825000 | 2.799497000  | -0.547848000 |
| 1 | -0.637653000 | 3.185872000  | -0.795565000 |
| 1 | -2.254663000 | 2.921454000  | -1.438663000 |
| 1 | -2.054720000 | 3.414307000  | 0.256340000  |

**22**, T.E. = -525.911684

|   |              |              |              |
|---|--------------|--------------|--------------|
| 7 | 1.927335000  | 0.150865000  | 0.000017000  |
| 5 | 1.074506000  | -1.007333000 | 0.000040000  |
| 7 | -0.355683000 | -0.739149000 | -0.000044000 |
| 5 | -0.817784000 | 0.633889000  | 0.000025000  |
| 7 | 0.206924000  | 1.665641000  | -0.000020000 |
| 6 | 1.543835000  | 1.474856000  | -0.000029000 |
| 6 | -1.275559000 | -1.763439000 | -0.000116000 |
| 6 | -2.319368000 | 0.878147000  | 0.000097000  |
| 6 | -3.142785000 | -0.213720000 | 0.000068000  |
| 6 | -2.618026000 | -1.542611000 | -0.000065000 |
| 1 | -4.226652000 | -0.097349000 | 0.000145000  |
| 1 | -3.288900000 | -2.396145000 | -0.000132000 |
| 1 | -0.876554000 | -2.772450000 | -0.000228000 |
| 1 | -2.774029000 | 1.866703000  | 0.000201000  |
| 6 | 1.627370000  | -2.486070000 | 0.000091000  |
| 1 | 1.274836000  | -3.043662000 | -0.878699000 |
| 1 | 2.718122000  | -2.547959000 | 0.000596000  |

|   |              |              |              |
|---|--------------|--------------|--------------|
| 1 | 1.273978000  | -3.043992000 | 0.878317000  |
| 6 | 3.381202000  | -0.029315000 | -0.000007000 |
| 1 | 3.833944000  | 0.963020000  | -0.000114000 |
| 1 | 3.711289000  | -0.574788000 | 0.890553000  |
| 1 | 3.711244000  | -0.574976000 | -0.890477000 |
| 6 | -0.218723000 | 3.063545000  | -0.000043000 |
| 1 | -0.818247000 | 3.286081000  | -0.889694000 |
| 1 | -0.817416000 | 3.286367000  | 0.890102000  |
| 1 | 0.677075000  | 3.686515000  | -0.000543000 |

**23**, T.E. = -541.970856

|   |              |              |              |
|---|--------------|--------------|--------------|
| 7 | 1.888917000  | 0.230071000  | -0.000003000 |
| 5 | 1.110636000  | -0.978535000 | -0.000009000 |
| 7 | -0.332121000 | -0.785092000 | -0.000011000 |
| 5 | -0.869304000 | 0.566042000  | -0.000008000 |
| 7 | 0.090393000  | 1.652392000  | -0.000018000 |
| 6 | 1.434907000  | 1.534327000  | -0.000012000 |
| 6 | -1.233939000 | -1.817174000 | -0.000007000 |
| 7 | -2.277638000 | 0.811289000  | 0.000007000  |
| 6 | -3.047050000 | -0.236044000 | 0.000013000  |
| 6 | -2.575452000 | -1.589035000 | 0.000004000  |
| 1 | -4.131879000 | -0.079507000 | 0.000027000  |
| 1 | -3.272199000 | -2.420711000 | 0.000007000  |
| 6 | 1.811737000  | -2.390759000 | 0.000000000  |
| 1 | 2.467243000  | -2.496053000 | -0.874864000 |
| 1 | 2.467272000  | -2.496025000 | 0.874847000  |
| 1 | 1.139414000  | -3.253389000 | 0.000025000  |
| 6 | 3.348367000  | 0.121303000  | 0.000019000  |
| 1 | 3.755045000  | 1.133367000  | -0.000032000 |
| 1 | 3.704020000  | -0.411034000 | 0.889165000  |
| 1 | 3.704042000  | -0.411136000 | -0.889055000 |

|   |              |              |              |
|---|--------------|--------------|--------------|
| 6 | -0.427201000 | 3.022206000  | 0.000002000  |
| 1 | -1.046499000 | 3.196712000  | -0.884406000 |
| 1 | -1.046037000 | 3.196865000  | 0.884707000  |
| 1 | 0.428902000  | 3.698374000  | -0.000264000 |
| 1 | -0.831050000 | -2.824557000 | -0.000013000 |

**24**, T.E. = -557.982330

|   |              |              |              |
|---|--------------|--------------|--------------|
| 7 | 1.874271000  | 0.228524000  | 0.000024000  |
| 5 | 1.094592000  | -0.983293000 | -0.000005000 |
| 7 | -0.344260000 | -0.762266000 | -0.000011000 |
| 5 | -0.874469000 | 0.578247000  | 0.000029000  |
| 7 | 0.080510000  | 1.659832000  | -0.000037000 |
| 6 | 1.429621000  | 1.531450000  | -0.000021000 |
| 7 | -1.157239000 | -1.846339000 | -0.000050000 |
| 7 | -2.296186000 | 0.796647000  | 0.000086000  |
| 6 | -3.003933000 | -0.284647000 | 0.000067000  |
| 6 | -2.433549000 | -1.611891000 | -0.000020000 |
| 1 | -4.096945000 | -0.208348000 | 0.000129000  |
| 1 | -3.074693000 | -2.490080000 | -0.000054000 |
| 6 | 1.733367000  | -2.414022000 | -0.000058000 |
| 1 | 2.379956000  | -2.559137000 | -0.876168000 |
| 1 | 2.379841000  | -2.559196000 | 0.876131000  |
| 1 | 0.976951000  | -3.202518000 | -0.000143000 |
| 6 | 3.332978000  | 0.102623000  | 0.000089000  |
| 1 | 3.754157000  | 1.108720000  | -0.000060000 |
| 1 | 3.678366000  | -0.436352000 | 0.888866000  |
| 1 | 3.678413000  | -0.436640000 | -0.888492000 |
| 6 | -0.428544000 | 3.033398000  | -0.000082000 |
| 1 | -1.044670000 | 3.214623000  | -0.885554000 |
| 1 | -1.043941000 | 3.214953000  | 0.885834000  |
| 1 | 0.432643000  | 3.702954000  | -0.000541000 |

**25**, T.E. = -557.956431

|   |              |              |              |
|---|--------------|--------------|--------------|
| 7 | 1.891995000  | 0.216996000  | 0.000095000  |
| 5 | 1.095998000  | -0.984516000 | -0.000035000 |
| 7 | -0.343239000 | -0.755281000 | -0.000108000 |
| 5 | -0.843445000 | 0.590008000  | -0.000065000 |
| 7 | 0.111459000  | 1.666688000  | -0.000141000 |
| 6 | 1.461129000  | 1.523762000  | -0.000033000 |
| 6 | -1.283101000 | -1.758007000 | -0.000156000 |
| 6 | -2.372585000 | 0.688667000  | 0.000174000  |
| 7 | -3.136204000 | -0.367582000 | 0.000263000  |
| 7 | -2.569655000 | -1.618671000 | -0.000014000 |
| 1 | -0.916140000 | -2.779758000 | -0.000334000 |
| 1 | -2.934986000 | 1.623516000  | 0.000442000  |
| 6 | 1.766275000  | -2.406971000 | -0.000092000 |
| 1 | 2.419459000  | -2.525719000 | -0.874985000 |
| 1 | 2.419331000  | -2.525901000 | 0.874866000  |
| 1 | 1.073576000  | -3.252685000 | -0.000233000 |
| 6 | 3.350966000  | 0.083255000  | 0.000233000  |
| 1 | 3.776335000  | 1.087352000  | 0.000534000  |
| 1 | 3.694156000  | -0.456156000 | 0.889380000  |
| 1 | 3.694372000  | -0.455713000 | -0.889090000 |
| 6 | -0.373722000 | 3.047191000  | -0.000166000 |
| 1 | -0.980478000 | 3.244274000  | -0.890194000 |
| 1 | -0.978597000 | 3.244987000  | 0.890994000  |
| 1 | 0.495941000  | 3.705910000  | -0.001307000 |

**26**, T.E. = -637.611880

|   |             |              |              |
|---|-------------|--------------|--------------|
| 7 | 2.158083000 | 0.684624000  | -0.088758000 |
| 5 | 1.571385000 | -0.642918000 | -0.178741000 |
| 7 | 0.152836000 | -0.677682000 | -0.058500000 |

|   |              |              |              |
|---|--------------|--------------|--------------|
| 5 | -0.630198000 | 0.530334000  | 0.020062000  |
| 7 | 0.136310000  | 1.763768000  | 0.156676000  |
| 6 | 1.498671000  | 1.856287000  | 0.103759000  |
| 7 | -2.054460000 | 0.394835000  | -0.141589000 |
| 6 | -2.490485000 | -0.827058000 | -0.673480000 |
| 6 | -1.751502000 | -1.940264000 | -0.628287000 |
| 1 | -3.450932000 | -0.812124000 | -1.184169000 |
| 1 | -2.088509000 | -2.874564000 | -1.067432000 |
| 6 | 2.453557000  | -1.933590000 | -0.354145000 |
| 1 | 3.196450000  | -1.812400000 | -1.152566000 |
| 1 | 3.026774000  | -2.155684000 | 0.557683000  |
| 1 | 1.839306000  | -2.809047000 | -0.584552000 |
| 6 | 3.610551000  | 0.816724000  | -0.185197000 |
| 1 | 3.863790000  | 1.863976000  | -0.012694000 |
| 1 | 4.112385000  | 0.192128000  | 0.561966000  |
| 1 | 3.966009000  | 0.519475000  | -1.178516000 |
| 6 | -0.506721000 | 3.066213000  | 0.326499000  |
| 1 | -1.210133000 | 3.273082000  | -0.486099000 |
| 1 | -1.032274000 | 3.131932000  | 1.286254000  |
| 1 | 0.285865000  | 3.815936000  | 0.312285000  |
| 7 | -0.474515000 | -1.959015000 | -0.013481000 |
| 6 | -3.103784000 | 1.390526000  | -0.010807000 |
| 1 | -2.829446000 | 2.158426000  | 0.709413000  |
| 1 | -3.339234000 | 1.875473000  | -0.969341000 |
| 1 | -4.015954000 | 0.910504000  | 0.361081000  |
| 6 | -0.521545000 | -2.475779000 | 1.350313000  |
| 1 | -0.964806000 | -3.476418000 | 1.320038000  |
| 1 | 0.496212000  | -2.559477000 | 1.743861000  |
| 1 | -1.121675000 | -1.842362000 | 2.023820000  |

27, T.E. = -600.831192

|   |              |              |              |
|---|--------------|--------------|--------------|
| 6 | 3.704302000  | 0.315840000  | -0.000102000 |
| 6 | 2.636203000  | 1.163212000  | 0.000053000  |
| 5 | 1.231452000  | 0.566126000  | 0.000066000  |
| 7 | 1.135639000  | -0.907127000 | -0.000009000 |
| 6 | 2.299451000  | -1.667712000 | -0.000104000 |
| 6 | 3.532802000  | -1.108849000 | -0.000197000 |
| 7 | 0.002979000  | 1.292118000  | 0.000129000  |
| 6 | -0.011667000 | -1.658770000 | 0.000105000  |
| 7 | -1.148778000 | -0.893705000 | 0.000122000  |
| 5 | -1.236376000 | 0.586751000  | -0.000040000 |
| 6 | -2.645069000 | 1.181346000  | -0.000374000 |
| 1 | -2.848262000 | 2.250408000  | -0.000774000 |
| 6 | -3.714329000 | 0.336836000  | -0.000290000 |
| 6 | -3.548331000 | -1.088550000 | 0.000102000  |
| 6 | -2.317233000 | -1.649699000 | 0.000270000  |
| 1 | 4.724009000  | 0.700838000  | -0.000156000 |
| 1 | 2.829423000  | 2.234492000  | 0.000129000  |
| 1 | 2.122604000  | -2.738062000 | -0.000135000 |
| 1 | 4.399774000  | -1.761943000 | -0.000323000 |
| 1 | -4.732397000 | 0.725947000  | -0.000564000 |
| 1 | -4.417176000 | -1.739113000 | 0.000214000  |
| 1 | -2.143437000 | -2.720464000 | 0.000457000  |
| 6 | 0.055490000  | 2.748401000  | 0.000265000  |
| 1 | 0.580691000  | 3.119374000  | 0.887491000  |
| 1 | 0.579850000  | 3.119616000  | -0.887362000 |
| 1 | -0.949056000 | 3.173189000  | 0.000832000  |

**28**, T.E. = -632.952110

|   |             |             |              |
|---|-------------|-------------|--------------|
| 6 | 3.553783000 | 0.420158000 | -0.000009000 |
| 7 | 2.510888000 | 1.187725000 | 0.000015000  |
| 5 | 1.226116000 | 0.550550000 | -0.000001000 |

|   |              |              |              |
|---|--------------|--------------|--------------|
| 7 | 1.130503000  | -0.930925000 | -0.000015000 |
| 6 | 2.314126000  | -1.648749000 | -0.000010000 |
| 6 | 3.513697000  | -1.020343000 | -0.000006000 |
| 7 | 0.001432000  | 1.270986000  | -0.000005000 |
| 6 | -0.005249000 | -1.698518000 | -0.000007000 |
| 7 | -1.135932000 | -0.925670000 | 0.000000000  |
| 5 | -1.227311000 | 0.559123000  | -0.000010000 |
| 7 | -2.514034000 | 1.194584000  | -0.000034000 |
| 6 | -3.558130000 | 0.430212000  | -0.000038000 |
| 6 | -3.520455000 | -1.010768000 | 0.000028000  |
| 6 | -2.322258000 | -1.640597000 | 0.000030000  |
| 1 | 4.542627000  | 0.892796000  | 0.000042000  |
| 1 | 2.185576000  | -2.726893000 | -0.000008000 |
| 1 | 4.432175000  | -1.597946000 | 0.000001000  |
| 1 | -4.545938000 | 0.904975000  | -0.000015000 |
| 1 | -4.439811000 | -1.586934000 | 0.000064000  |
| 1 | -2.195725000 | -2.718950000 | 0.000057000  |
| 6 | 0.021805000  | 2.733567000  | 0.000024000  |
| 1 | 0.548200000  | 3.106066000  | 0.883364000  |
| 1 | 0.548705000  | 3.106090000  | -0.883000000 |
| 1 | -1.003740000 | 3.105760000  | -0.000249000 |

29, T.E. = -664.965570

|   |              |              |              |
|---|--------------|--------------|--------------|
| 6 | -3.516770000 | 0.380809000  | -0.000012000 |
| 5 | -1.217639000 | 0.542688000  | -0.000016000 |
| 7 | -1.124363000 | -0.927404000 | 0.000008000  |
| 6 | -3.385211000 | -1.064235000 | 0.000023000  |
| 7 | -0.001375000 | 1.271801000  | -0.000020000 |
| 6 | 0.005454000  | -1.706565000 | 0.000007000  |
| 7 | 1.129827000  | -0.922327000 | -0.000004000 |
| 5 | 1.218777000  | 0.551327000  | -0.000001000 |



|   |              |              |              |
|---|--------------|--------------|--------------|
| 6 | 3.521093000  | 0.391348000  | 0.000019000  |
| 6 | 3.392225000  | -1.054344000 | -0.000017000 |
| 1 | -4.531781000 | 0.793056000  | -0.000038000 |
| 1 | -4.270916000 | -1.695610000 | 0.000040000  |
| 1 | 4.535082000  | 0.806032000  | 0.000044000  |
| 1 | 4.279185000  | -1.683987000 | -0.000039000 |
| 6 | -0.022422000 | 2.735544000  | 0.000011000  |
| 1 | -0.547517000 | 3.108127000  | -0.883721000 |
| 1 | -0.546779000 | 3.108110000  | 0.884194000  |
| 1 | 1.002423000  | 3.109494000  | -0.000389000 |
| 7 | -2.257548000 | -1.694616000 | 0.000027000  |
| 7 | -2.509167000 | 1.182334000  | -0.000034000 |
| 7 | 2.266240000  | -1.686510000 | -0.000028000 |
| 7 | 2.511870000  | 1.189487000  | 0.000023000  |

**30**, T.E. = -664.916646

|   |              |              |              |
|---|--------------|--------------|--------------|
| 6 | -2.658559000 | 1.071849000  | 0.000016000  |
| 5 | -1.209703000 | 0.558699000  | -0.000017000 |
| 7 | -1.121287000 | -0.897020000 | -0.000011000 |
| 6 | -2.323641000 | -1.598382000 | -0.000001000 |
| 7 | -0.002258000 | 1.307337000  | -0.000042000 |
| 6 | 0.009305000  | -1.675840000 | -0.000020000 |
| 7 | 1.131191000  | -0.886939000 | -0.000016000 |
| 5 | 1.213020000  | 0.574018000  | -0.000018000 |
| 6 | 2.664789000  | 1.086018000  | 0.000026000  |
| 1 | 2.943039000  | 2.141087000  | 0.000080000  |
| 6 | 2.336914000  | -1.584744000 | -0.000014000 |
| 1 | -2.931282000 | 2.128615000  | 0.000047000  |
| 1 | -2.215202000 | -2.679980000 | -0.000014000 |
| 1 | 2.230379000  | -2.666517000 | -0.000048000 |
| 6 | -0.041343000 | 2.768487000  | -0.000027000 |

|   |              |              |              |
|---|--------------|--------------|--------------|
| 1 | -0.561135000 | 3.140252000  | -0.888427000 |
| 1 | -0.560301000 | 3.140266000  | 0.888857000  |
| 1 | 0.969198000  | 3.179266000  | -0.000518000 |
| 7 | -3.688644000 | 0.279906000  | 0.000039000  |
| 7 | -3.504757000 | -1.089891000 | 0.000017000  |
| 7 | 3.695842000  | 0.296536000  | 0.000050000  |
| 7 | 3.516188000  | -1.074344000 | 0.000007000  |

**31**, T.E. = -824.242347

|   |              |              |              |
|---|--------------|--------------|--------------|
| 6 | -3.575456000 | -0.379185000 | 0.433849000  |
| 5 | -1.237585000 | -0.646076000 | -0.062397000 |
| 7 | -1.128532000 | 0.811637000  | -0.083774000 |
| 6 | -3.455378000 | 0.951854000  | 0.347580000  |
| 7 | -0.000008000 | -1.369412000 | 0.022849000  |
| 6 | 0.000019000  | 1.537435000  | -0.079575000 |
| 7 | 1.128584000  | 0.811637000  | -0.083584000 |
| 5 | 1.237574000  | -0.646103000 | -0.062249000 |
| 6 | 3.575562000  | -0.379370000 | 0.433705000  |
| 6 | 3.455484000  | 0.951685000  | 0.347575000  |
| 1 | -4.436378000 | -0.850461000 | 0.899459000  |
| 1 | -4.220783000 | 1.618163000  | 0.731219000  |
| 1 | 4.436556000  | -0.850654000 | 0.899176000  |
| 1 | 4.221038000  | 1.617909000  | 0.731068000  |
| 6 | -0.000011000 | -2.742724000 | 0.518216000  |
| 1 | -0.883195000 | -2.915772000 | 1.139402000  |
| 1 | -0.000118000 | -3.488644000 | -0.286748000 |
| 1 | 0.883295000  | -2.915843000 | 1.139208000  |
| 7 | -2.356178000 | 1.548293000  | -0.272243000 |
| 7 | -2.544455000 | -1.220488000 | -0.025124000 |
| 7 | 2.356187000  | 1.548306000  | -0.271756000 |
| 7 | 2.544389000  | -1.220623000 | -0.024997000 |

|   |              |              |              |
|---|--------------|--------------|--------------|
| 6 | 2.229466000  | 2.980163000  | -0.116246000 |
| 1 | 1.562416000  | 3.386431000  | -0.877238000 |
| 1 | 1.834062000  | 3.271031000  | 0.869431000  |
| 1 | 3.230782000  | 3.397788000  | -0.255111000 |
| 6 | 2.951866000  | -2.529257000 | -0.486023000 |
| 1 | 3.327698000  | -3.158286000 | 0.335431000  |
| 1 | 2.116686000  | -3.045986000 | -0.961073000 |
| 1 | 3.751999000  | -2.434587000 | -1.232353000 |
| 6 | -2.229421000 | 2.980183000  | -0.116835000 |
| 1 | -1.834342000 | 3.271144000  | 0.868939000  |
| 1 | -1.562103000 | 3.386300000  | -0.877667000 |
| 1 | -3.230677000 | 3.397822000  | -0.256110000 |
| 6 | -2.952073000 | -2.529366000 | -0.485295000 |
| 1 | -2.117089000 | -3.046314000 | -0.960429000 |
| 1 | -3.327524000 | -3.157979000 | 0.336658000  |
| 1 | -3.752518000 | -2.435117000 | -1.231342000 |

**32**, T.E. = -868.323720

|   |              |              |              |
|---|--------------|--------------|--------------|
| 6 | -3.737477000 | 0.006057000  | 0.018884000  |
| 6 | -2.623896000 | 0.829951000  | 0.009554000  |
| 5 | -1.238797000 | 0.229887000  | 0.001533000  |
| 7 | -1.134219000 | -1.248221000 | 0.001152000  |
| 6 | -2.305637000 | -1.986464000 | 0.007873000  |
| 6 | -3.537379000 | -1.431750000 | 0.015967000  |
| 7 | -0.002835000 | 0.951980000  | -0.007754000 |
| 6 | 0.006330000  | -2.003112000 | -0.006147000 |
| 7 | 1.139872000  | -1.237917000 | -0.013304000 |
| 5 | 1.242325000  | 0.246672000  | -0.014117000 |
| 6 | 2.634624000  | 0.837545000  | -0.018044000 |
| 1 | 2.795559000  | 1.910786000  | -0.007828000 |
| 6 | 3.745635000  | 0.012377000  | -0.028403000 |

|   |              |              |              |
|---|--------------|--------------|--------------|
| 6 | 3.544597000  | -1.424905000 | -0.025272000 |
| 6 | 2.312454000  | -1.976405000 | -0.018427000 |
| 7 | -5.023239000 | 0.483147000  | 0.033171000  |
| 1 | -2.770433000 | 1.905788000  | 0.006235000  |
| 1 | -2.148961000 | -3.060513000 | 0.006036000  |
| 1 | -4.383476000 | -2.107812000 | 0.020616000  |
| 7 | 5.033986000  | 0.487198000  | -0.046706000 |
| 1 | 4.389267000  | -2.102625000 | -0.028814000 |
| 1 | 2.154126000  | -3.050108000 | -0.016280000 |
| 6 | -0.056852000 | 2.403852000  | -0.009461000 |
| 1 | -0.598204000 | 2.775006000  | -0.888492000 |
| 1 | -0.569020000 | 2.778892000  | 0.885373000  |
| 1 | 0.946481000  | 2.832621000  | -0.027501000 |
| 6 | -5.237437000 | 1.910158000  | 0.011951000  |
| 1 | -6.308130000 | 2.118417000  | 0.049550000  |
| 1 | -4.764684000 | 2.395731000  | 0.876596000  |
| 1 | -4.828070000 | 2.369070000  | -0.900118000 |
| 6 | -6.163805000 | -0.405535000 | -0.023281000 |
| 1 | -6.174496000 | -1.010303000 | -0.940828000 |
| 1 | -6.198530000 | -1.083734000 | 0.839494000  |
| 1 | -7.077941000 | 0.190461000  | -0.008814000 |
| 6 | 6.169261000  | -0.401208000 | 0.080765000  |
| 1 | 6.221581000  | -1.117851000 | -0.748697000 |
| 1 | 7.085851000  | 0.190890000  | 0.057971000  |
| 1 | 6.157003000  | -0.963611000 | 1.025481000  |
| 6 | 5.251609000  | 1.912984000  | -0.002222000 |
| 1 | 4.758213000  | 2.412370000  | -0.846372000 |
| 1 | 4.867740000  | 2.359150000  | 0.928036000  |
| 1 | 6.321366000  | 2.120002000  | -0.067064000 |

**33**, T.E. = -829.581975

|   |              |              |              |
|---|--------------|--------------|--------------|
| 6 | -3.634483000 | 0.372285000  | 0.000107000  |
| 6 | -2.492340000 | 1.126636000  | 0.000056000  |
| 5 | -1.152646000 | 0.426263000  | -0.000012000 |
| 7 | -1.165585000 | -1.054087000 | 0.000001000  |
| 6 | -2.382228000 | -1.712445000 | 0.000056000  |
| 6 | -3.572997000 | -1.067735000 | 0.000106000  |
| 7 | 0.133873000  | 1.051958000  | -0.000094000 |
| 6 | -0.080728000 | -1.893963000 | -0.000034000 |
| 7 | 1.107062000  | -1.219400000 | -0.000050000 |
| 5 | 1.315753000  | 0.253390000  | -0.000054000 |
| 6 | 2.755312000  | 0.746969000  | -0.000008000 |
| 1 | 3.012903000  | 1.801624000  | 0.000045000  |
| 6 | 3.761108000  | -0.178903000 | 0.000000000  |
| 6 | 3.484357000  | -1.593551000 | -0.000037000 |
| 6 | 2.218775000  | -2.056546000 | -0.000054000 |
| 1 | -2.619802000 | 2.206811000  | 0.000075000  |
| 1 | -2.298764000 | -2.794393000 | 0.000069000  |
| 1 | -4.474048000 | -1.668927000 | 0.000174000  |
| 1 | 4.319017000  | -2.286032000 | -0.000041000 |
| 1 | 1.972571000  | -3.112995000 | -0.000072000 |
| 6 | 0.188367000  | 2.506336000  | -0.000119000 |
| 1 | -0.309551000 | 2.915601000  | -0.886797000 |
| 1 | -0.308602000 | 2.915626000  | 0.887087000  |
| 1 | 1.220955000  | 2.858384000  | -0.000696000 |
| 8 | -4.823531000 | 1.020574000  | 0.000203000  |
| 8 | 5.086580000  | 0.083582000  | 0.000049000  |
| 6 | -6.028568000 | 0.283384000  | -0.000176000 |
| 1 | -6.120383000 | -0.341139000 | -0.897446000 |
| 1 | -6.120868000 | -0.341261000 | 0.896963000  |
| 1 | -6.827648000 | 1.026589000  | -0.000332000 |
| 6 | 5.493119000  | 1.435308000  | 0.000095000  |

|   |             |             |              |
|---|-------------|-------------|--------------|
| 1 | 5.132301000 | 1.956087000 | -0.895668000 |
| 1 | 5.132318000 | 1.956026000 | 0.895901000  |
| 1 | 6.584068000 | 1.420546000 | 0.000087000  |
